# Supplementary material
Source: PubMed Central journal article supplement (PMC4594949)
Supplement: NIHMS640724-supplement-7.pdf [file NIHMS640724-supplement-7.pdf]

**Supplemental Table S5. Top 10 highly expressed receptor kinases in HEMs**

| Gene Name (Gene ID)                                     | Average FPKM $\pm$ SEM            |
|---------------------------------------------------------|-----------------------------------|
| tyrosine kinase-type cell surface receptor HER3 (ERBB3) | 67.3 $\pm$ 9.4                    |
| <b>stem cell growth factor receptor Kit (KIT)</b>       | <b>53.6 <math>\pm</math> 11.7</b> |
| transforming growth factor, beta receptor II (TGFB2)    | 48.7 $\pm$ 10.4                   |
| <b>tyrosine-protein kinase receptor TYRO3 (TYRO3)</b>   | <b>23.7 <math>\pm</math> 3.4</b>  |
| <b>hepatocyte growth factor receptor (MET)</b>          | <b>23.4 <math>\pm</math> 6.1</b>  |
| fibroblast growth factor receptor 1 (FGFR1)             | 23.3 $\pm$ 2.7                    |
| discoidin domain receptor tyrosine kinase 2 (DDR2)      | 21.0 $\pm$ 4.7                    |
| receptor-like tyrosine kinase (RYK)                     | 17.6 $\pm$ 3.0                    |
| transforming growth factor, beta receptor 1 (TGFB1)     | 16.1 $\pm$ 5.3                    |
| activin A receptor, type I (ACVR1)                      | 15.7 $\pm$ 1.4                    |

**Supplemental Table S5. Top 10 highly expressed receptor kinases in HEMs.** The highest expressed receptor kinases in melanocytes were obtained by averaging their FPKM from each library. Receptor kinase genes known to play a vital role in melanocyte function are highlighted in bold.
