# Supplementary material
Source: PubMed Central journal article supplement (PMC4594949)
Supplement: NIHMS640724-supplement-8.pdf [file NIHMS640724-supplement-8.pdf]

**Supplemental Table S6. Top 25 highly expressed transcription factors in HEMs**

| Gene Name (Gene ID)                                               | Average FPKM $\pm$ SEM             |
|-------------------------------------------------------------------|------------------------------------|
| <b>Y box binding protein 1 (YBX1)</b>                             | <b>463.6 <math>\pm</math> 49.3</b> |
| high mobility group 20B (HMG20B)                                  | 210.4 $\pm$ 84.3                   |
| activating transcription factor 4 (ATF4)                          | 200.0 $\pm$ 27.6                   |
| endothelial differentiation-related factor 1 (EDF1)               | 176.7 $\pm$ 17.5                   |
| <b>SRY (sex determining region Y)-box 10 (SOX10)</b>              | <b>171.0 <math>\pm</math> 39.4</b> |
| <b>microphthalmia-associated transcription factor (MITF)</b>      | <b>159.3 <math>\pm</math> 58.4</b> |
| eukaryotic translation initiation factor 3, subunit K (EIF3K)     | 154.8 $\pm$ 13.0                   |
| prohibitin 2 (PHB2)                                               | 141.6 $\pm$ 10.1                   |
| upstream transcription factor 2, c-fos interacting (USF2)         | 140.4 $\pm$ 38.6                   |
| transcription factor AP-2 alpha (TFAP2A)                          | 133.0 $\pm$ 41.7                   |
| cold shock domain containing E1, RNA-binding (CSDE1)              | 125.9 $\pm$ 19.2                   |
| v-ets avian erythroblastosis virus E26 oncogene homolog 1 (ETS1)  | 122.7 $\pm$ 14.6                   |
| interferon, gamma-inducible protein 16 (IFI16)                    | 117.2 $\pm$ 39.9                   |
| plexin C1 (PLXNC1)                                                | 114.9 $\pm$ 22.6                   |
| nuclear factor, erythroid 2-like 1 (NFE2L1)                       | 106.5 $\pm$ 23.2                   |
| H1 histone family, member 0 (H1F0)                                | 103.8 $\pm$ 18.9                   |
| snail family zinc finger 2 (SNAI2)                                | 101.2 $\pm$ 24.3                   |
| ceramide synthase 2 (CERS2)                                       | 98.8 $\pm$ 6.7                     |
| sterol regulatory element binding transcription factor 2 (SREBF2) | 93.5 $\pm$ 15.5                    |
| high mobility group box 1 (HMGB1)                                 | 84.2 $\pm$ 32.2                    |
| EWS RNA-binding protein 1 (EWSR1)                                 | 82.1 $\pm$ 14.5                    |
| transcription elongation factor A (SII)-like 8 (TCEAL8)           | 81.6 $\pm$ 14.5                    |
| zinc finger protein 106 (ZFP106)                                  | 80.9 $\pm$ 13.2                    |
| ets variant 5 (ETV5)                                              | 78.0 $\pm$ 11.3                    |
| signal transducer and activator of transcription 6 (STAT6)        | 76.6 $\pm$ 13.8                    |

**Supplemental Table S6. Top 25 highly expressed transcription factor genes in HEMs.** The highest expressed transcription factors in melanocytes were obtained by averaging their FPKM from each library. Transcription factors important for melanocyte function are in bold.
