# Supplementary material
Source: PubMed Central journal article supplement (PMC4594949)

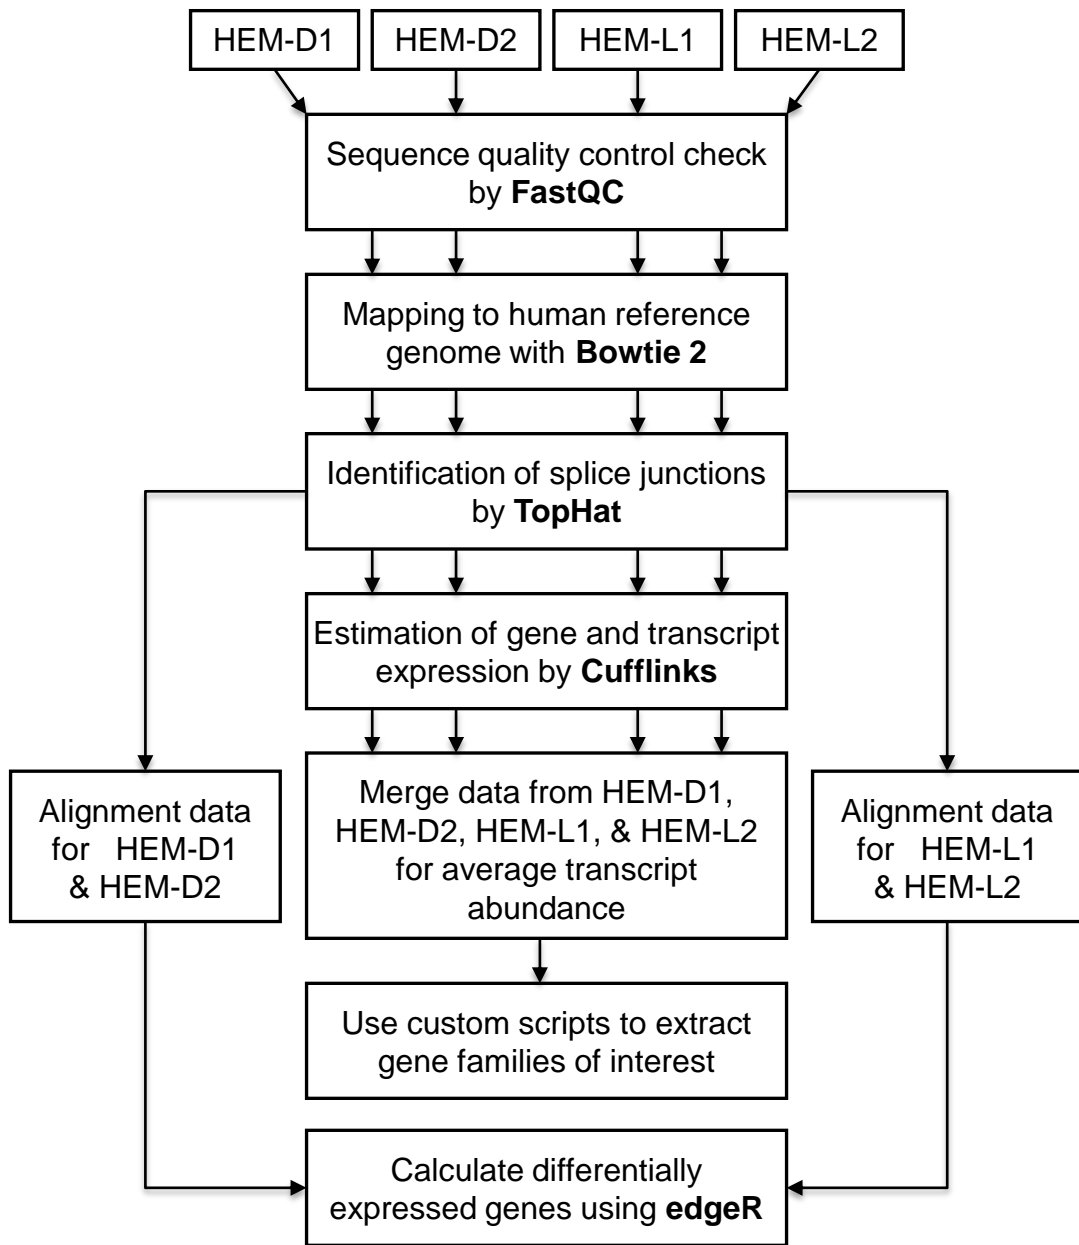

Figure S2. Computational pipeline and analysis steps for RNA sequencing data.

Supplement: NIHMS640724-supplement-1.pdf [file NIHMS640724-supplement-1.pdf]
